# Supplementary material
Source: MDPI journal article supplement (https://www.mdpi.com/2073-4344/13/3/630)
Supplement: s1 [file s1]

Figure S1. 5%Ru/HPS 100x magnitude SEM5%Ru/HPS SEM image at 100x magnitude.

Figure S2. 5%Ru/HPS 3000x magnitude SEM image at 3000x magnitude.

Figure S3. 5%Ru/HPS 5000x magnitude SEM image at 5000x magnitude.

Figure S4. 5%Ru/HPS 10000x magnitude SEM image at 10000x magnitude.

Figure S5. 3%Ru@0.1%Co/HPS 100x magnitude SEM image at 100x magnitude.

Figure S6. 3%Ru@0.1%Co/HPS 3000x magnitude SEM image at 3000x magnitude.,

Figure S7. 3%Ru@0.1%Co/HPS 5000x magnitude SEM image at 5000x magnitude.

Figure S8. 3%Ru@0.1%Co/HPS 10000x magnitude SEM image at 10000x magnitude.

Figure S9. 3%Ru@0.1%Cu/HPS 100x magnitude SEM image at 100x magnitude.

Figure S10. 3%Ru@0.1%Cu/HPS 3000x magnitude SEM image at 3000x magnitude.

Figure S11. 3%Ru@0.1%Cu/HPS 5000x magnitude SEM image at 5000x magnitude.

Figure S12. 3%Ru@0.1%Cu/HPS 10000x magnitude SEM image at 10000x magnitude.

Figure S13. 3%Ru@0.1%Ni/HPS 100x magnitude SEM image at 100x magnitude.

Figure S14. 3%Ru@0.1%Ni/HPS 3000x magnitude SEM image at 3000x magnitude.

Figure S15. 3%Ru@0.1%Ni/HPS 5000x magnitude SEM image at 5000x magnitude.

Figure S16. 3%Ru@0.1%Ni/HPS 10000x magnitude SEM image at 10000x magnitude.

Figure S17. FT-IR spectrum of canola oil (red) and canola FAME (black).

Figure S18.  $^1\text{H}$  NMR spectrum of canola FAME in  $\text{CDCl}_3$ .

Figure S19. Canola FAME GC–MS chromatogram.

Table S1. List of identified compounds for the canola FAME GC-MS chromatogram.

Figure S20. Hydrogenated canola FAME GC–MS chromatogram.

Table S2. List of identified compounds for the hydrogenated canola FAME GC–MS chromatogram.

Figure S21. Hydroformylated canola FAME GC–MS chromatogram.

Table S3. List of identified compounds for the hydroformylated canola FAME GC-MS chromatogram.

Figure S22. Oxidized canola FAME GC–MS chromatogram.

Table S4. List of identified compounds for the oxidized canola FAME GC–MS chromatogram CG-MS.

Figure S23. Deoxygenated canola FAME GC–MSGC-MS chromatogram.

Table S5. List of identified compounds for the deoxygenated canola FAME GC–MS chromatogram CG-MS.

## Doped ruthenium/hyperscrosslinked polystyrene (HPS) catalysts in the modification of fatty acid methyl esters – Support Information

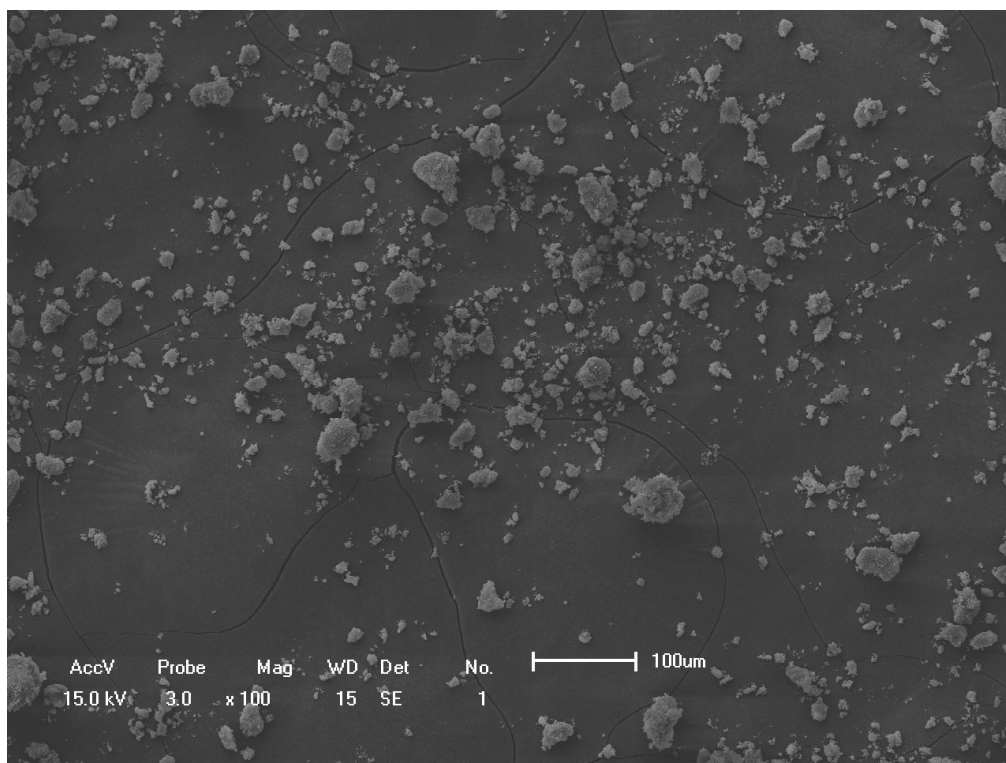

*Figure S1. 5%Ru/HPS 100x magnitude SEM.*

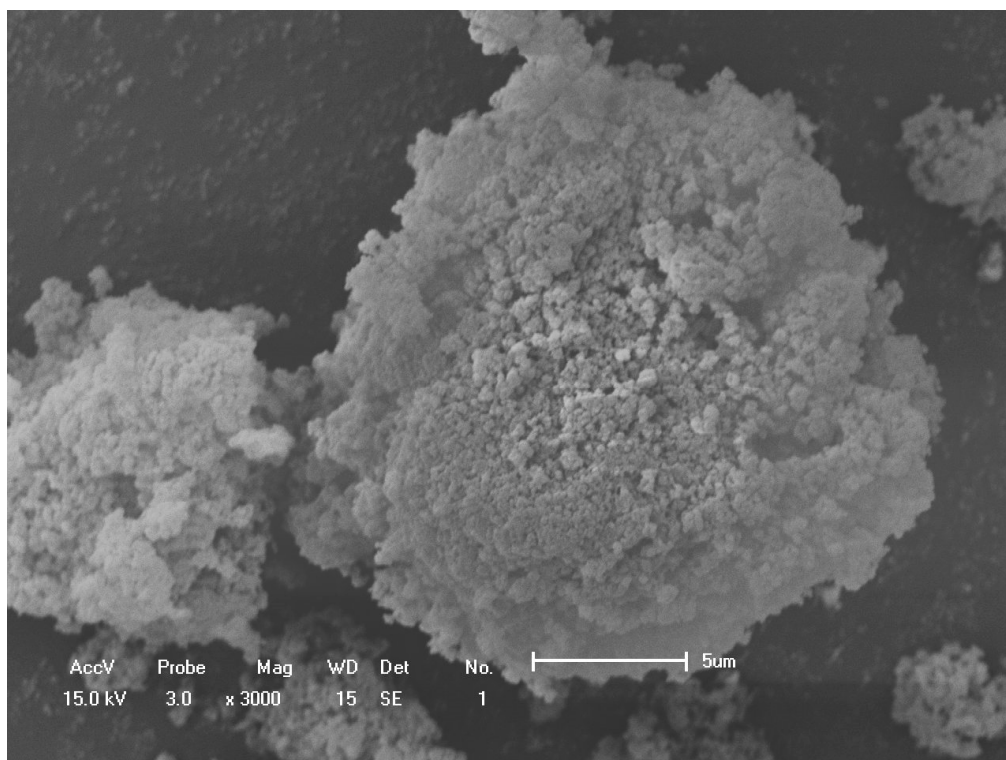

*Figure S2. 5%Ru/HPS 3000x magnitude SEM.*

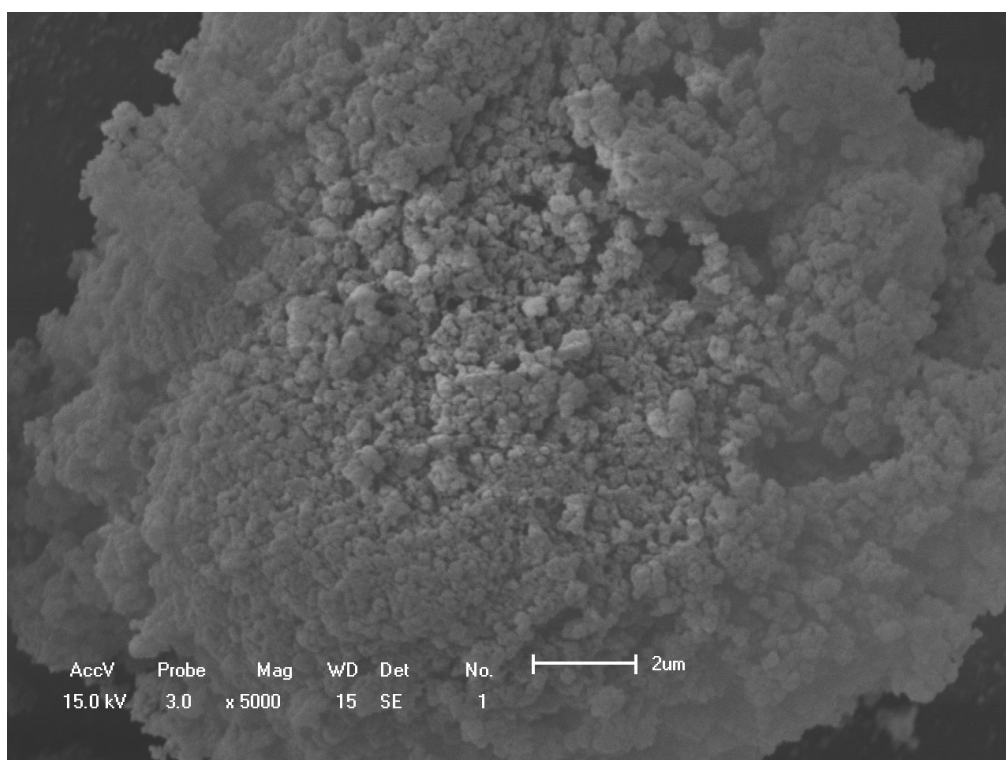

*Figure S3. 5%Ru/HPS 5000x magnitude SEM.*



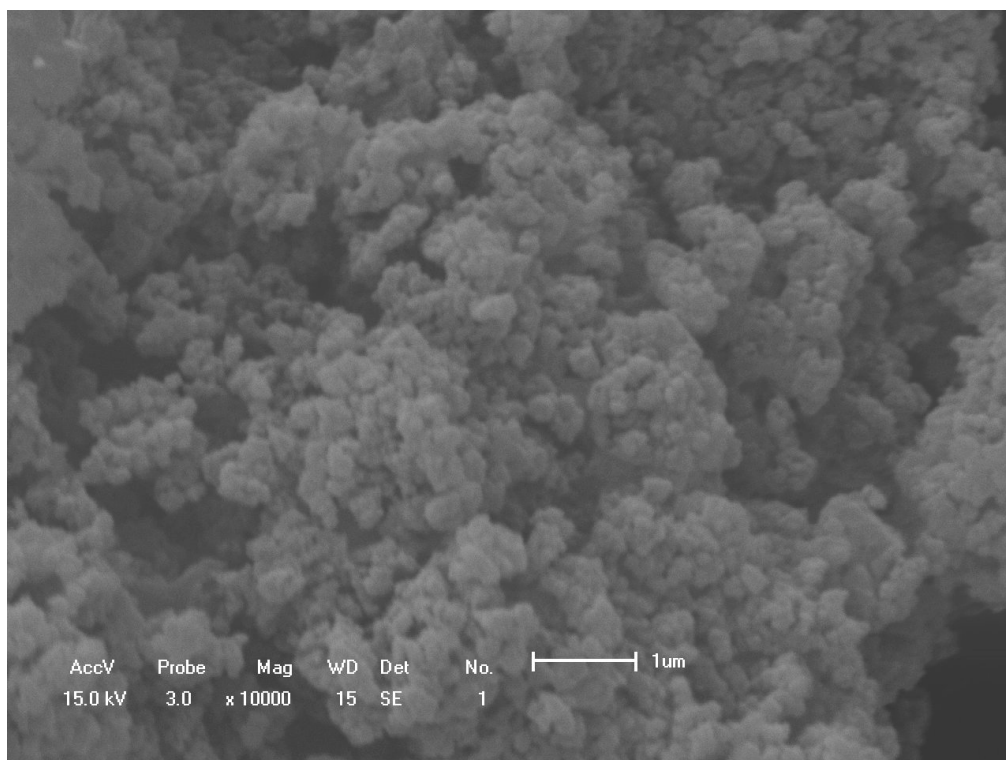

*Figure S4. 5%Ru/HPS 10000x magnitude SEM.*

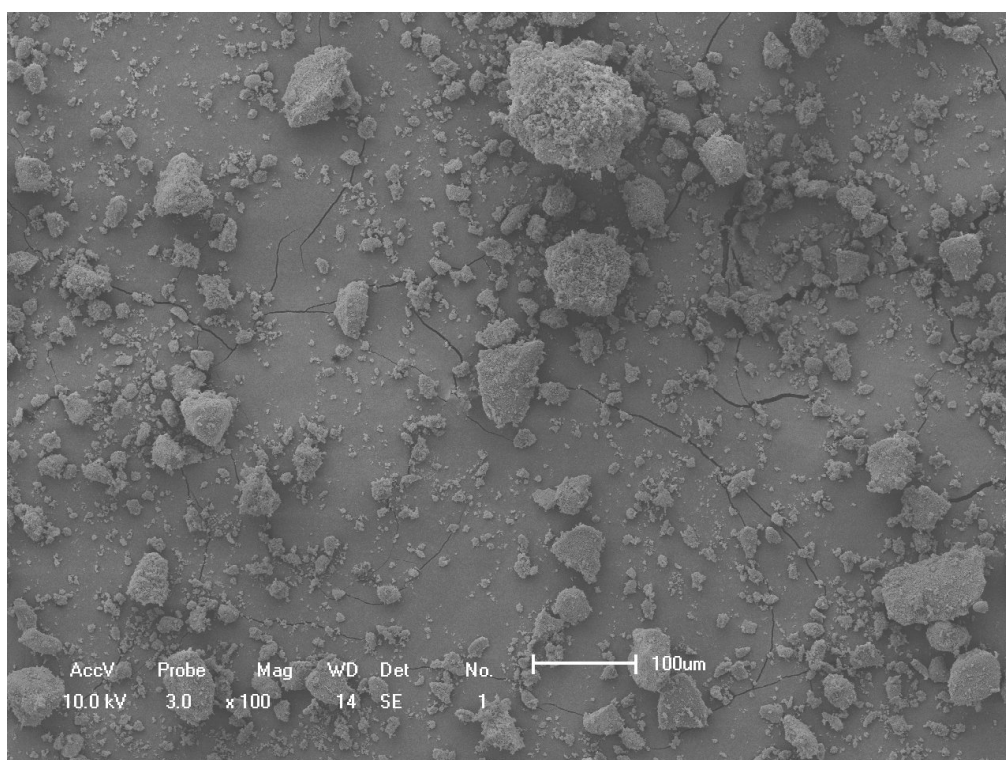

*Figure S5. 3%Ru@0.1%Co/HPS 100x magnitude SEM.*

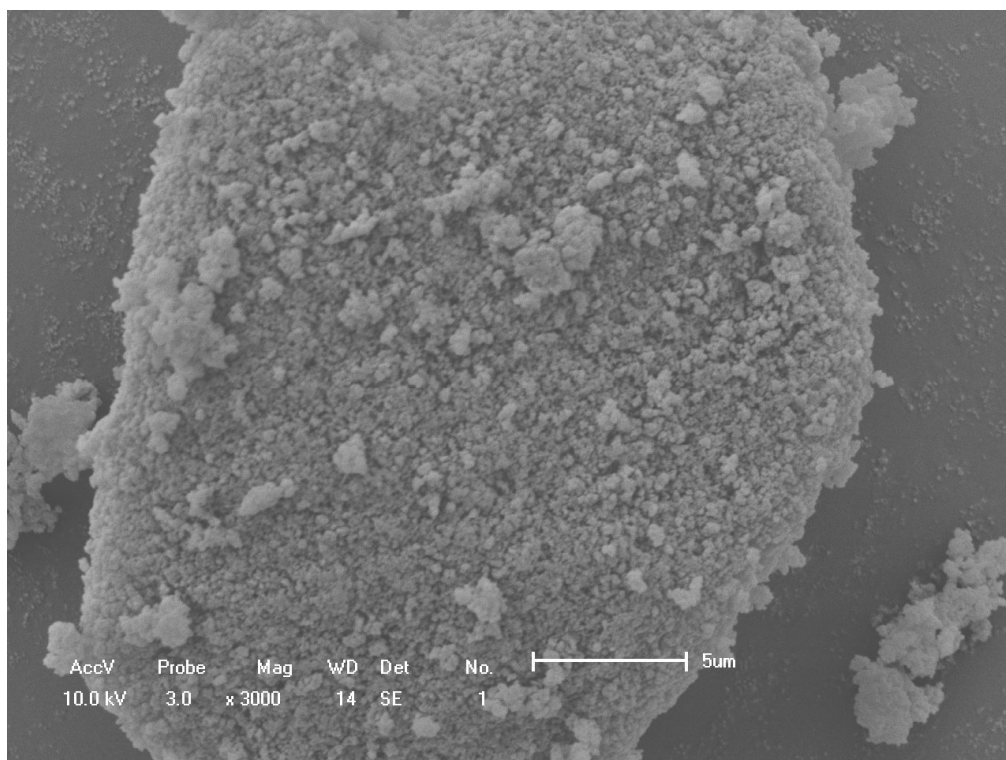

*Figure S6. 3%Ru@0.1%Co/HPS 3000x magnitude SEM.*

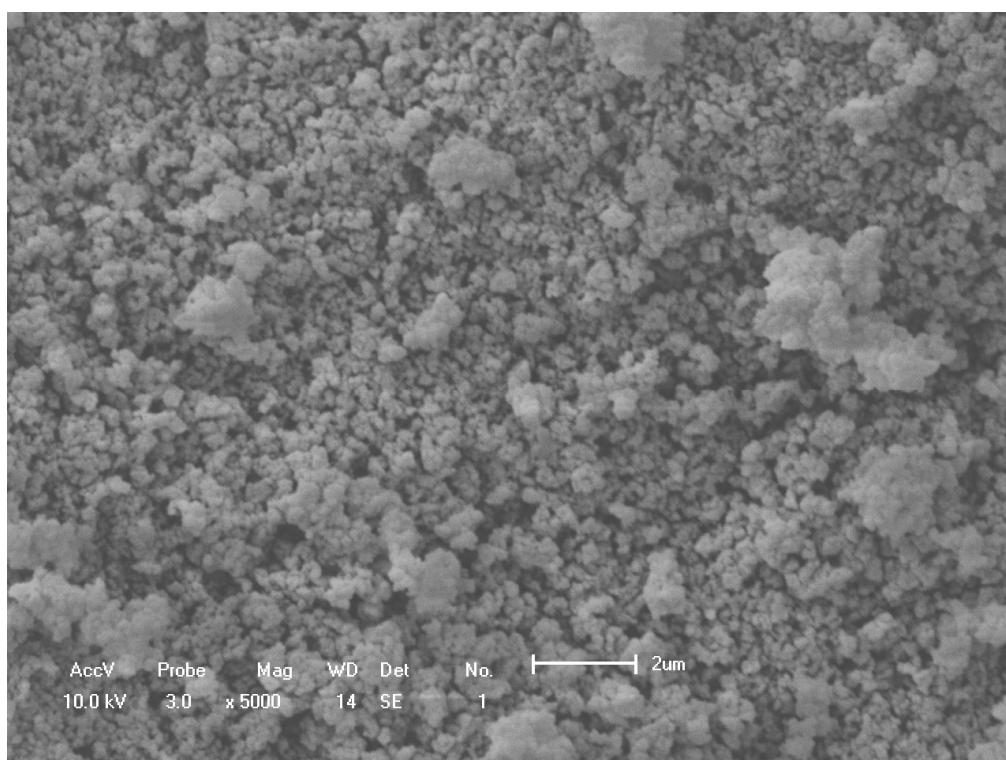

*Figure S7. 3%Ru@0.1%Co/HPS 5000x magnitude SEM.*



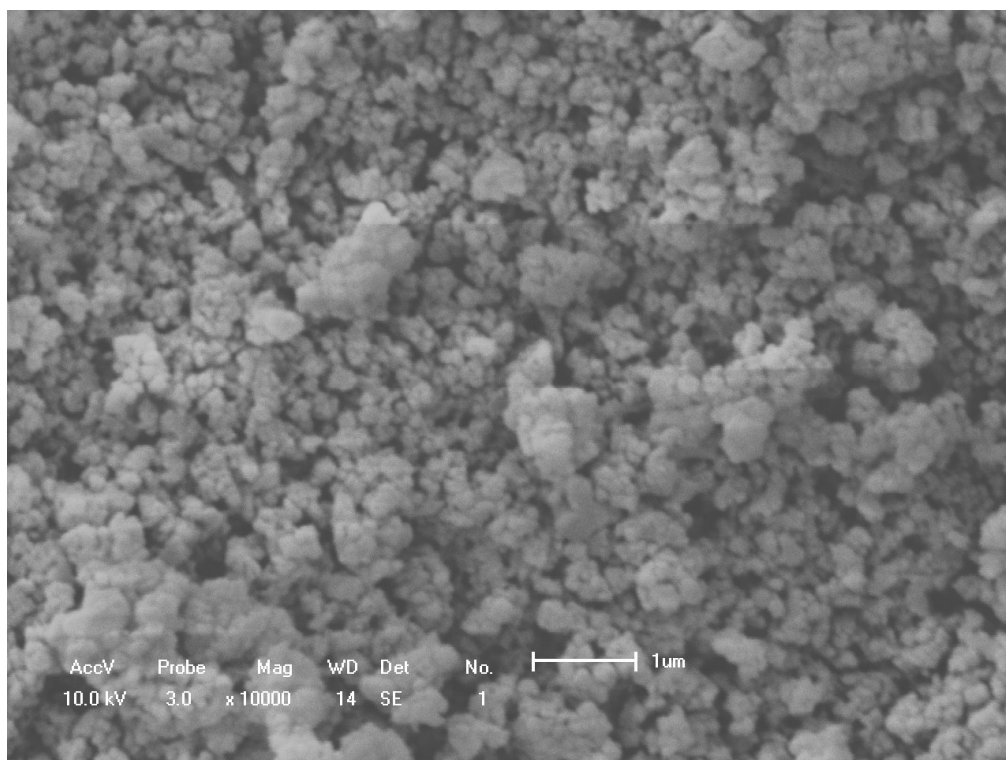

*Figure S8. 3%Ru@0.1%Co/HPS 10000x magnitude SEM.*

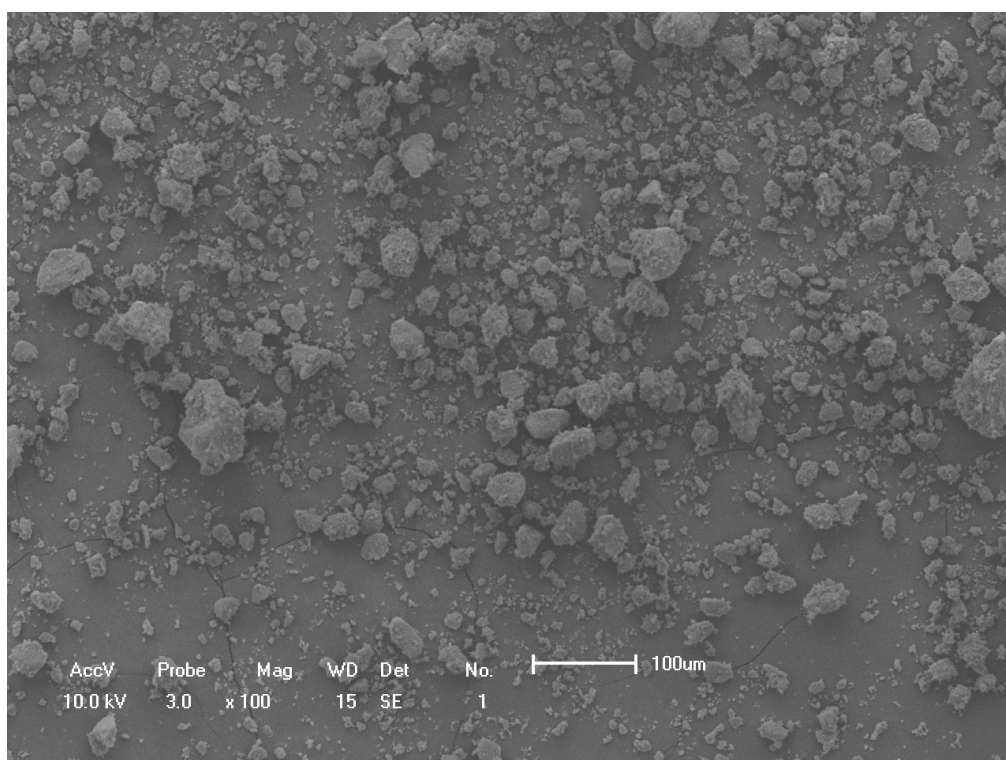

*Figure S9. 3%Ru@0.1%Cu/HPS 100x magnitude SEM.*

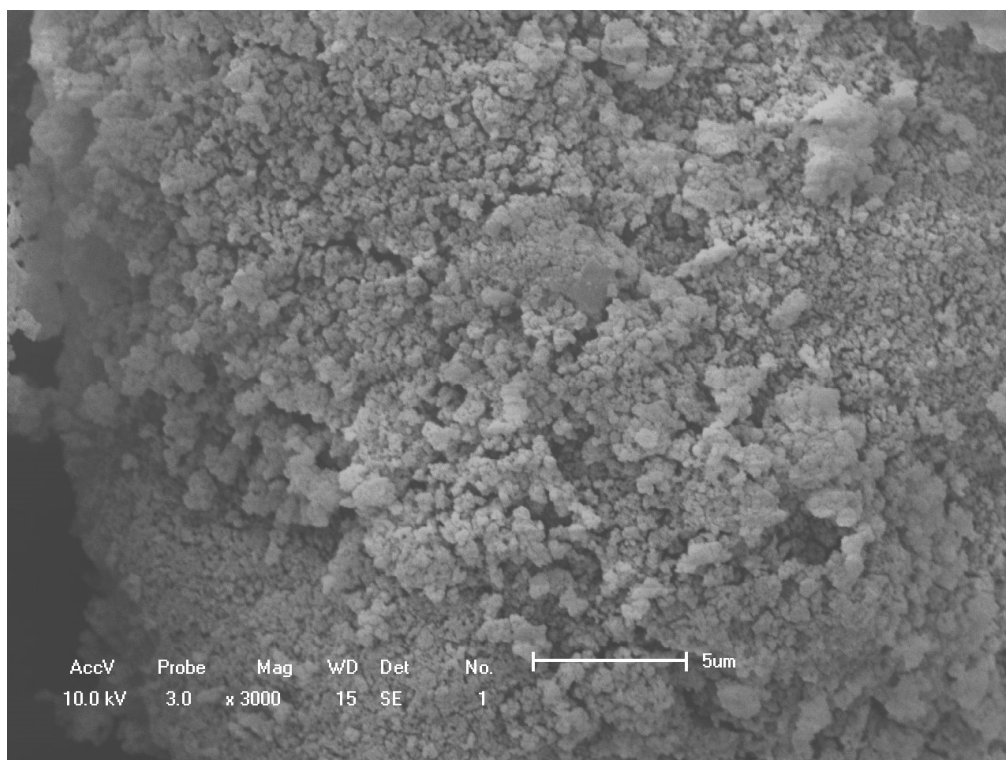

*Figure S10. 3%Ru@0.1%Cu/HPS 3000x magnitude SEM.*

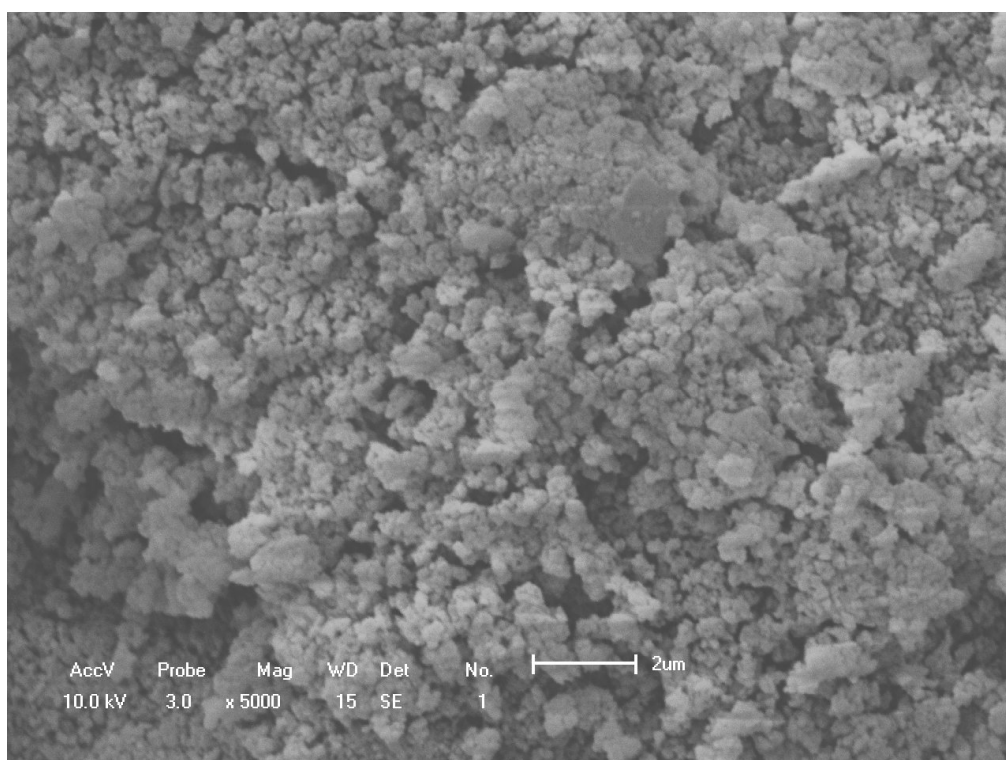

*Figure S11. 3%Ru@0.1%Cu/HPS 5000x magnitude SEM.*



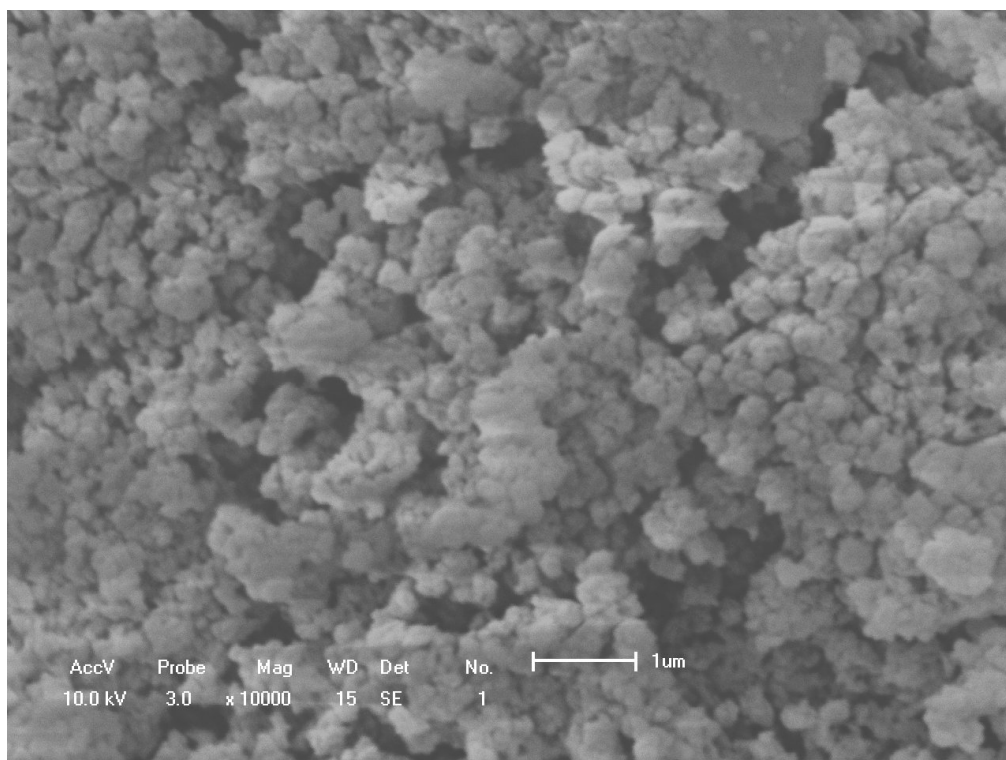

*Figure S12. 3%Ru@0.1%Cu/HPS 10000x magnitude SEM.*

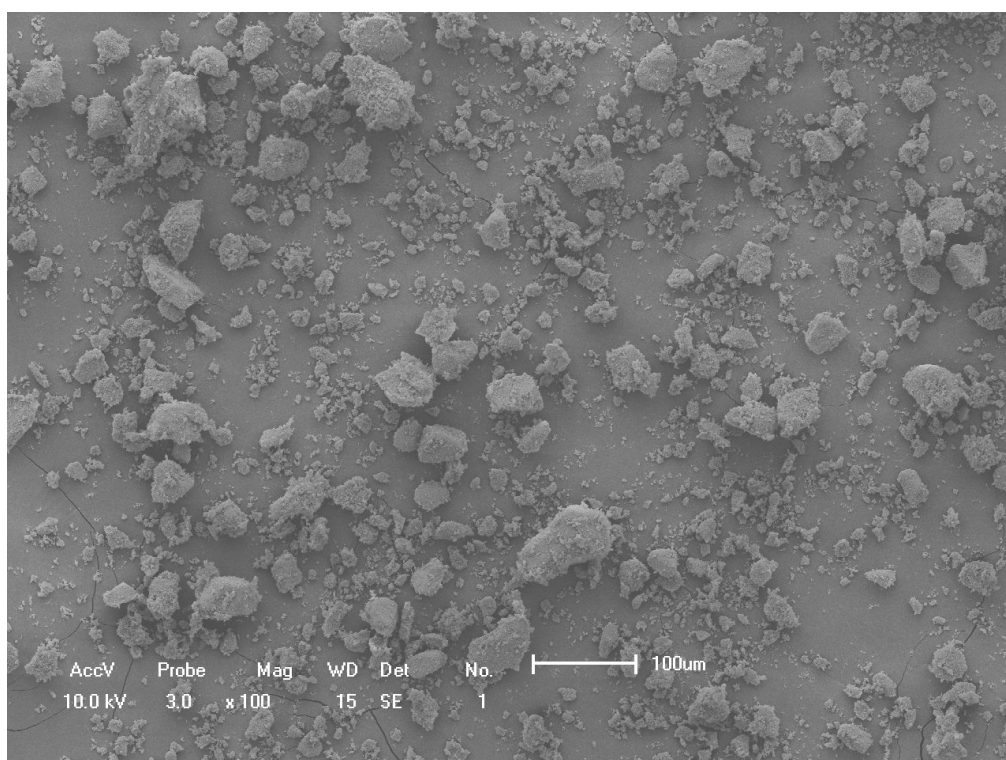

*Figure S13. 3%Ru@0.1%Ni/HPS 100x magnitude SEM.*

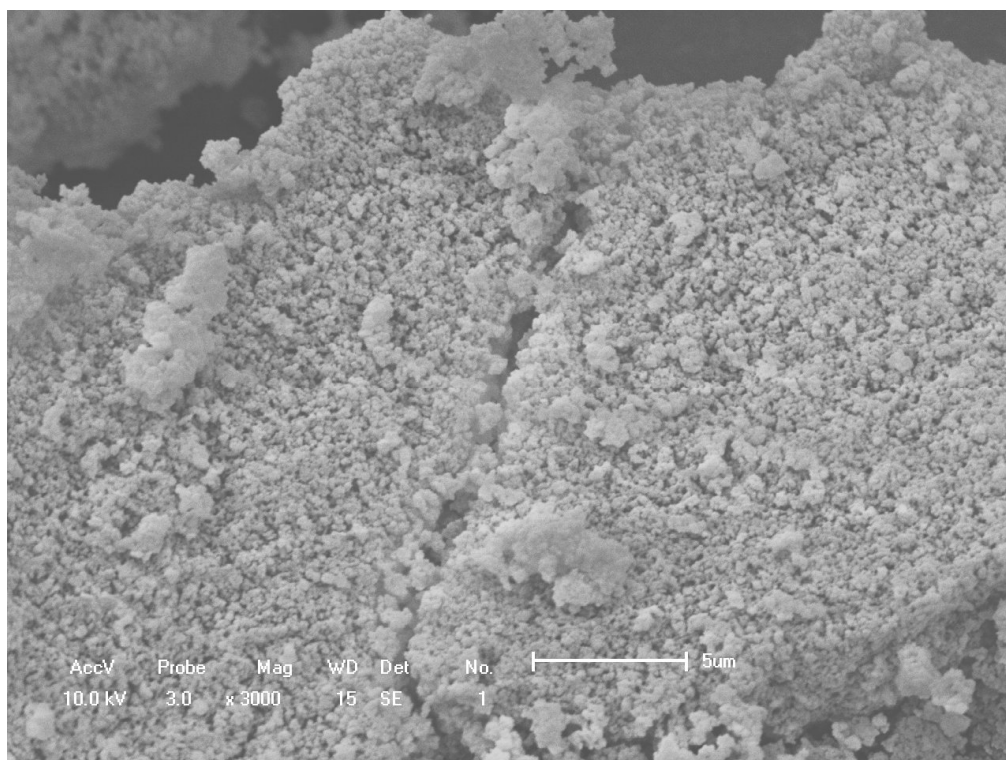

*Figure S14. 3%Ru@0.1%Ni/HPS 3000x magnitude SEM.*

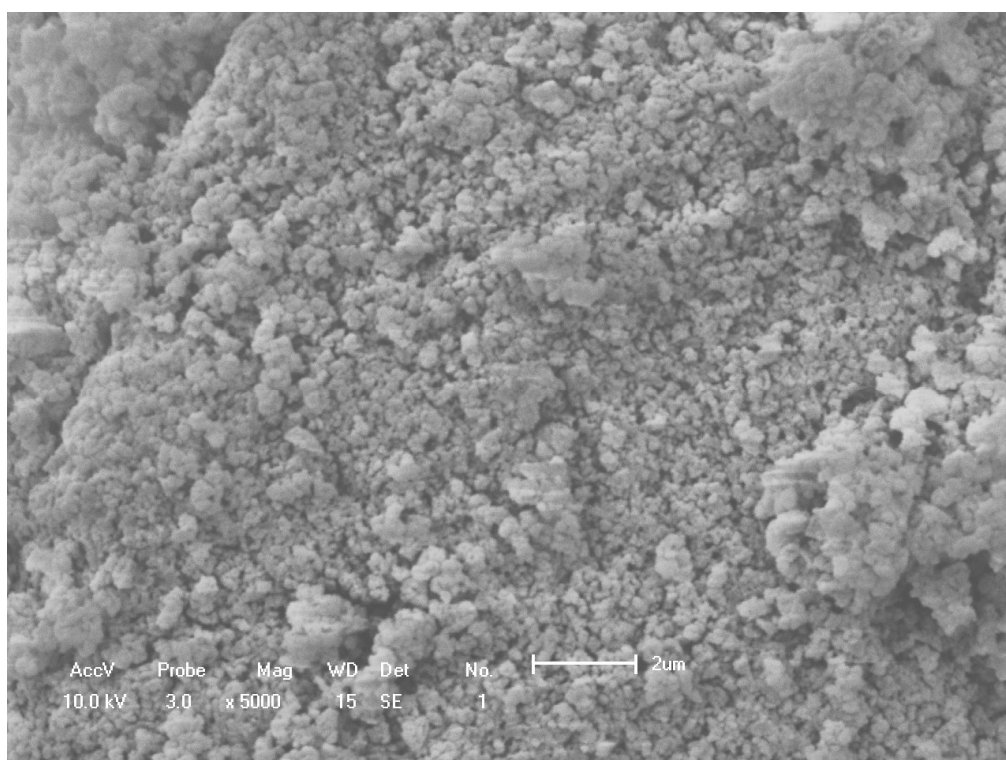

*Figure S15. 3%Ru@0.1%Ni/HPS 5000x magnitude SEM.*



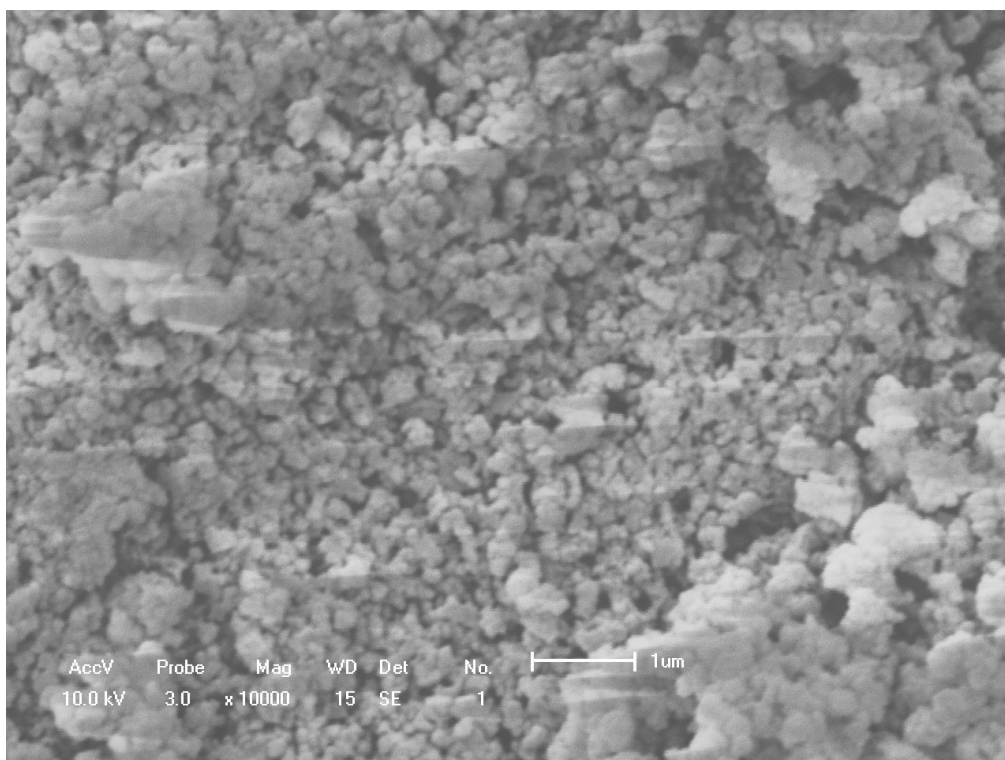

Figure S16. 3%Ru@0.1%Ni/HPS 10000x magnitude SEM.

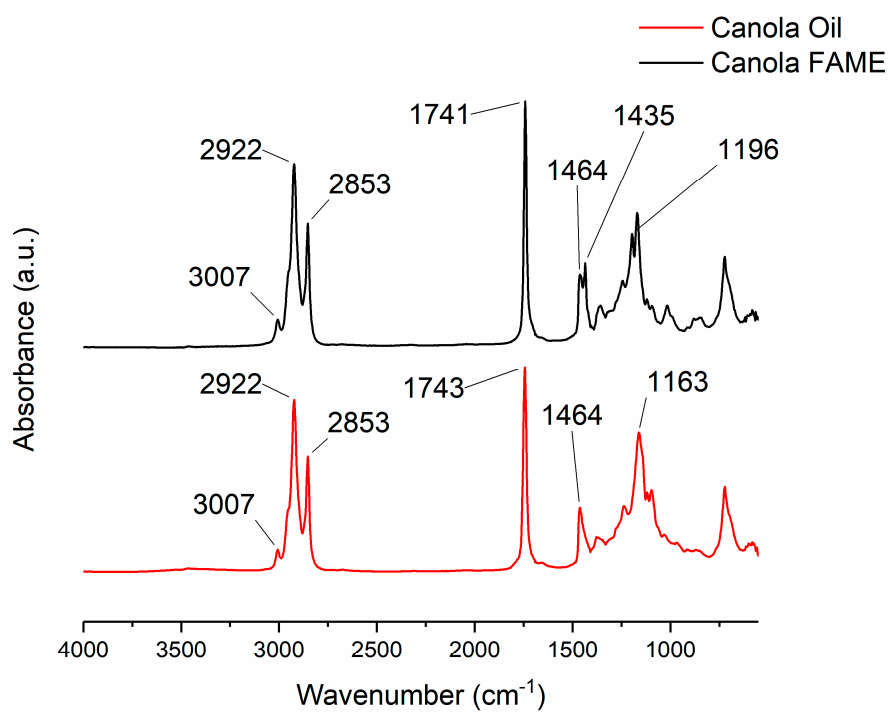

Figure S17. FT-IR spectrum of canola oil (red) and canola FAME (black).

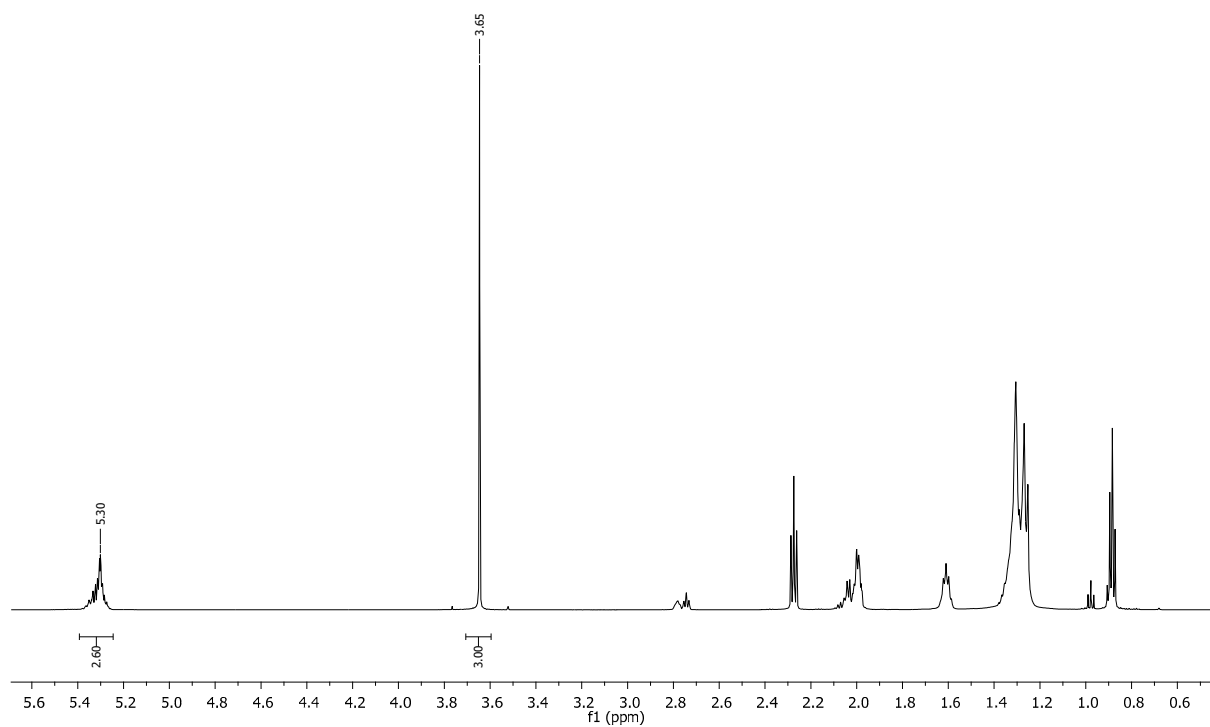

Figure S18.  $^1\text{H}$  NMR spectrum of canola FAME in  $\text{CDCl}_3$ .

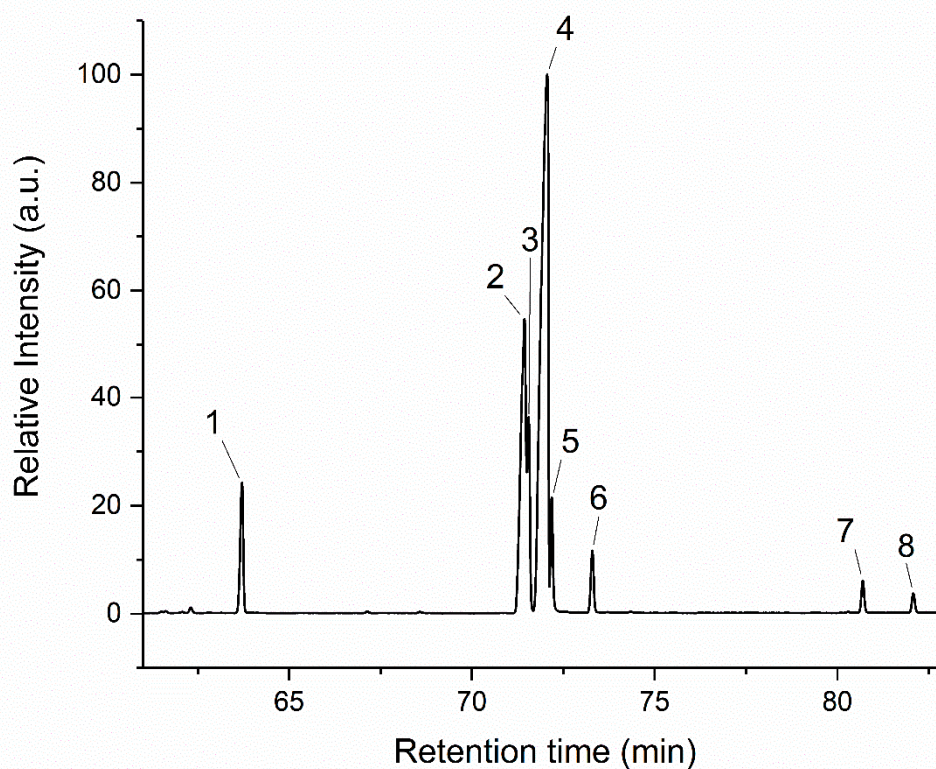

Figure S19. Canola FAME GC-MS chromatogram.

Table S1. List of identified compounds for the canola FAME CG-MS.

| Peak | Compound                                              | Retention time (min) | MS match score (%) |
|------|-------------------------------------------------------|----------------------|--------------------|
| 1    | Hexadecanoic acid. methyl ester                       | 63.70                | 91                 |
| 2    | 12.15-Octadecadienoic acid. methyl ester              | 71.40                | 89                 |
| 3    | 9.12.15-Octadecatrienoic acid. methyl ester. (Z.Z.Z)- | 71.45                | 91                 |
| 4    | 9-Octadecenoic acid. methyl ester. (E)-               | 72.10                | 94                 |
| 5    | 9-Octadecenoic acid (Z)-. methyl ester                | 72.20                | 93                 |
| 6    | Methyl stearate                                       | 73.30                | 93                 |
| 7    | cis-13-Eicosenoic acid. methyl ester                  | 80.70                | 92                 |
| 8    | Eicosanoic acid. methyl ester                         | 82.10                | 92                 |

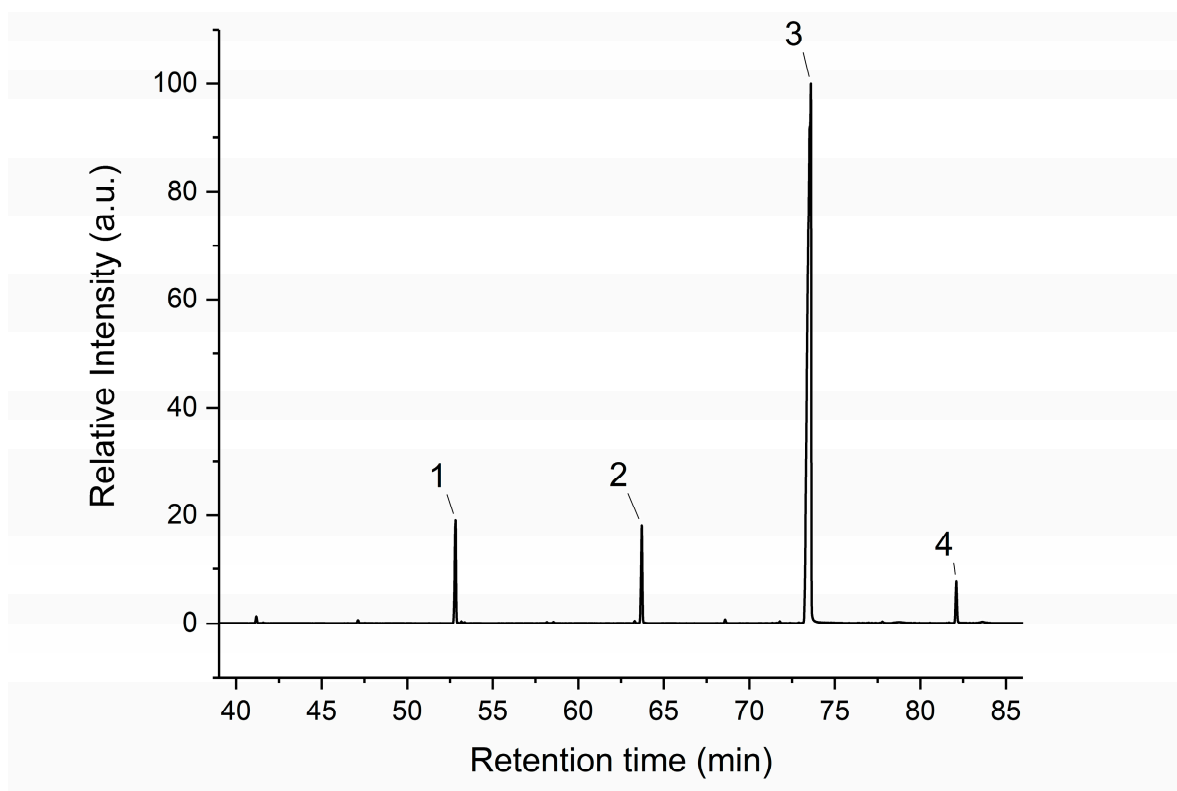

Figure S20. Hydrogenated canola FAME GC-MS chromatogram.

Table S2. List of identified compounds for the hydrogenated canola FAME CG-MS.

| Peak | Compound                        | Retention time (min) | MS match score (%) |
|------|---------------------------------|----------------------|--------------------|
| 1    | Octadecane                      | 52.80                | 93                 |
| 2    | Hexadecanoic acid. methyl ester | 63.70                | 92                 |
| 3    | Methyl stearate                 | 73.50                | 93                 |
| 4    | Eicosanoic acid. methyl ester   | 82.10                | 91                 |

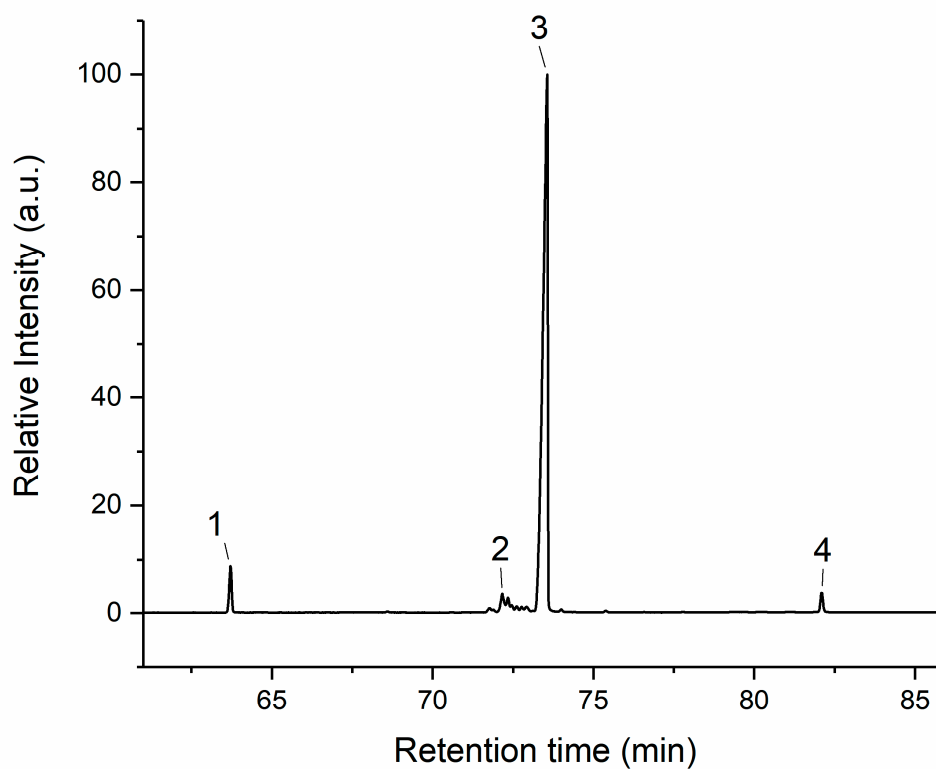

Figure S21. Hydroformylated canola FAME GC-MS chromatogram.

Table S3. List of identified compounds for the hydroformylated canola FAME CG-MS.

| Peak | Compound                                | Retention time (min) | MS match score (%) |
|------|-----------------------------------------|----------------------|--------------------|
| 1    | Hexadecanoic acid. methyl ester         | 63.70                | 97                 |
| 2    | 6-Octadecenoic acid. methyl ester. (Z)- | 72.20                | 96                 |
| 3    | Methyl stearate                         | 73.60                | 97                 |
| 4    | Methyl 18-methylnonadecanoate           | 82.10                | 95                 |

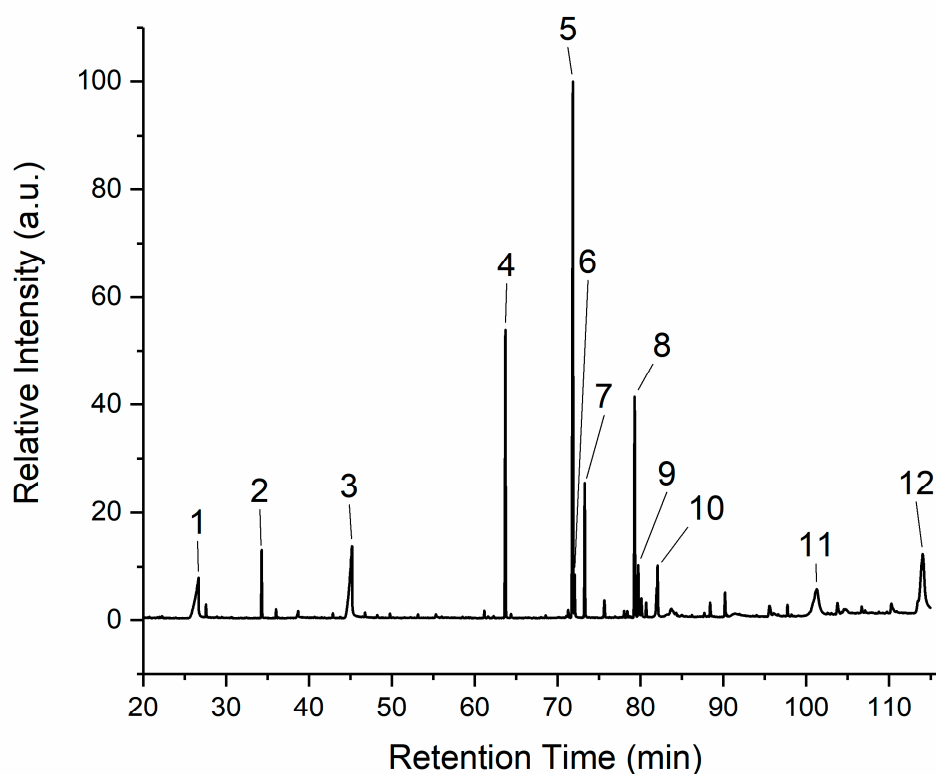

Figure S22. Oxidized canola FAME GC-MS chromatogram.

Table S4. List of identified compounds for the oxidized canola FAME CG-MS.

| Peak | Compound                                           | Retention time (min) | MS match score (%) |
|------|----------------------------------------------------|----------------------|--------------------|
| 1    | Nonanoic acid                                      | 26.70                | 97                 |
| 2    | Nonanoic acid, 9-oxo-, methyl ester                | 34.30                | 94                 |
| 3    | Nonanedioic acid, monomethyl ester                 | 45.20                | 91                 |
| 4    | Hexadecanoic acid, methyl ester                    | 63.70                | 92                 |
| 5    | 9-Octadecenoic acid, methyl ester, (E)-            | 71.80                | 93                 |
| 6    | 9-Octadecenoic acid (Z)-, methyl ester             | 72.00                | 94                 |
| 7    | Methyl stearate                                    | 73.30                | 95                 |
| 8    | Oxiraneoctanoic acid, 3-octyl-, methyl ester, cis- | 79.30                | 92                 |
| 9    | Oxiraneoctanoic acid, 3-octyl-, cis-               | 79.70                | 82                 |
| 10   | Eicosanoic acid, methyl ester                      | 82.05                | 89                 |
| 11   | Octadecanoic acid, docosyl ester                   | 101.30               | 88                 |
| 12   | Octadecanoic acid, octadecyl ester                 | 114.00               | 88                 |



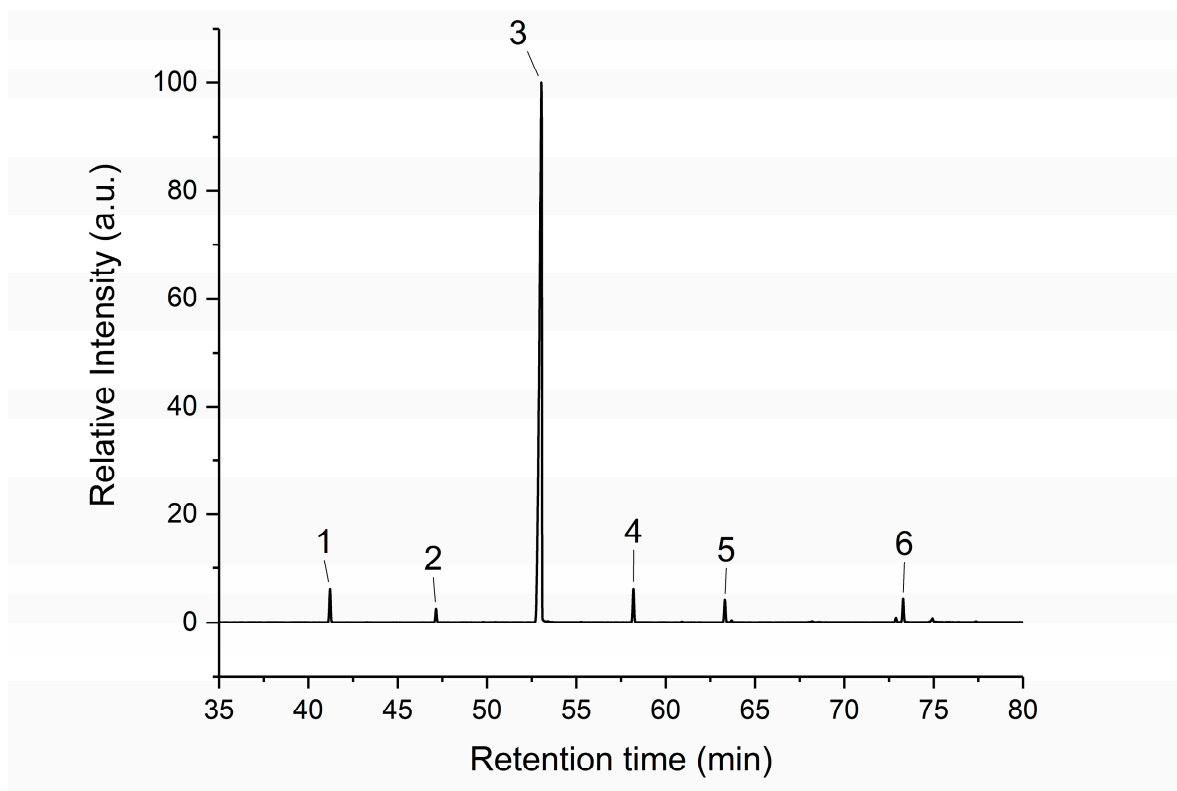

Figure S23. Deoxygenated canola FAME GC-MS chromatogram.

Table S5. List of identified compounds for the deoxygenated canola FAME CG-MS.

| Peak | Compound        | Retention time (min) | MS match score (%) |
|------|-----------------|----------------------|--------------------|
| 1    | Pentadecane     | 41.20                | 97                 |
| 2    | Heptadecane     | 47.15                | 97                 |
| 3    | Heneicosane     | 53.00                | 97                 |
| 4    | Octadecane      | 58.20                | 98                 |
| 5    | Nonadecane      | 63.30                | 98                 |
| 6    | Methyl stearate | 73.30                | 97                 |
